# Supplementary material
Source: PubMed Central journal article supplement (PMC8530434)

---

**Supplementary information**

---

**Precision medicine treatment in acute myeloid leukemia using prospective genomic profiling: feasibility and preliminary efficacy of the Beat AML Master Trial**

---

In the format provided by the authors and unedited

## Supplementary Information

### Statistics Supplemental Information

Per protocol, a one-sided Wald confidence interval was used to estimate the lower limit on the success rate to determine feasibility. With 109 patients, there was 90% power to rule out proportions of 0.8 or lower with 95% confidence. We therefore required 94/109 (86.2%) successes such that the 95% lower confidence bound on the estimate would be greater than 80%; 16/109 (14.7%) failures would have motivated early termination.

**Supplementary Table 1. Reasons for Screen Fail of 92 patients from Figure 1B**

| <b>Reason, no. (%)</b>                          | <b>Ineligible Patients<br/>(n=92)</b> |
|-------------------------------------------------|---------------------------------------|
| Alternative Diagnosis                           | 71 (77)                               |
| Confounding Medical Condition                   | 6 (7)                                 |
| Master Group A/B Criteria Not Met               | 5 (5)                                 |
| Symptomatic CNS Involvement                     | 3 (3)                                 |
| Compliance Concerns                             | 3 (3)                                 |
| Leukostasis Requiring Urgent Therapy            | 1 (1)                                 |
| Disseminated Intravascular Coagulopathy         | 1 (1)                                 |
| Age Criteria Not Met                            | 1 (1)                                 |
| Viable Material Unavailable for Genetic Testing | 1 (1)                                 |

**Supplementary Table 2. Adverse Events of Special Interest for 26 patients**

| <b>Adverse Events of Special Interest (AESI)</b>                                                                                           | <b>N</b> |
|--------------------------------------------------------------------------------------------------------------------------------------------|----------|
| Death prior to treatment assignment due to AML progression                                                                                 | 6        |
| Life threatening bleeding (CNS, GI, acute hemorrhage requiring transfusion)                                                                | 6        |
| Progression of disease requiring therapy before treatment assignment                                                                       | 0        |
| Worsening of performance status by more than 2 levels or new requirement for ICU care, intubation, or emergent surgery related to leukemia | 8        |
| Combination of Above AESI Categories*                                                                                                      | 6        |

\*All 6 patients had life threatening bleeding, one with progression and death prior to treatment assignment, one with progression of disease requiring therapy before treatment assignment, three with worsening status related to leukemia, and one with worsening status related to AML progression and death prior to treatment assignment.

**Supplementary Table 3. Treatment Options on Beat AML Master Trial**

| AML Subtype                             | Drug                                              |
|-----------------------------------------|---------------------------------------------------|
| CBF                                     | Samalizumab (CD200 Ab) + induction                |
| NPM1 + FLT3-ITD                         | Entospletinib (Syk inhibitor) + induction (fit)   |
|                                         | Entospletinib (Syk inhibitor) monotherapy (unfit) |
| MLL rearranged                          | Entospletinib (Syk inhibitor)                     |
| IDH2 +                                  | Enasidenib                                        |
| IDH1 +                                  | Ivosidenib + Aza                                  |
| TP53+                                   | Entospletinib (Syk inhibitor) + Decitabine        |
| TP53 - Complex Karotype ( $\geq 3$ abn) | Entospletinib (Syk inhibitor) + Decitabine        |
| TP53+                                   | Pevonedistat (Nedd8 inhibitor) + Aza              |
| FLT3-ITD+ or FLT3-TKD +                 | Gilteritinib monotherapy or + Decitabine          |
| Tet2/WT1                                | BI 836858 (CD33 Ab) + Aza                         |
| Marker Negative                         | BI 836858 (CD33 Ab) + Aza                         |

**Supplementary Table 4. Distribution of patients in molecular groups defined by the prioritized schema and according to actual treatment assignment**

| Group, n (%)                      | Prioritized Schema<br>(n = 395) | Treatment Assignment<br>(n = 395) |
|-----------------------------------|---------------------------------|-----------------------------------|
| CBF                               | 9 (2.3)                         | 2 (0.5)                           |
| NPM1+ FLT3-ITD WT                 | 46 (11.7)                       | 29 (7.3)                          |
| MLL Rearranged                    | 11 (2.8)                        | 7 (1.8)                           |
| IDH2+                             | 45 (11.4)                       | 54 (13.7)                         |
| IDH1+                             | 23 (5.8)                        | 11 (2.8)                          |
| TP53+                             | 76 (19.2)                       | 60 (15.2)                         |
| TP53 - Complex Karyotype (>3 abn) | 31 (7.9)                        | 15 (3.8)                          |
| FLT3-ITD+ or FLT3-TKD+            | 27 (6.8)                        | 7 (1.8)                           |
| TET2 / WT1                        | 49 (12.4)                       | 64 (16.2)                         |
| Marker Negative                   | 78 (19.8)                       | 146 (37.0)                        |

**Supplementary Table 5. Treatment Assignments for All 395 Eligible Patients Screened for Beat AML**

| Prioritized Schema Group | Actual Treatment Assignment |             |            |              |             |              |             |            |              |               | Total        |
|--------------------------|-----------------------------|-------------|------------|--------------|-------------|--------------|-------------|------------|--------------|---------------|--------------|
|                          | CBF                         | NPM1        | MLL        | IDH2         | IDH1        | TP53         | Complex     | FLT3       | TET2 / WT1   | Marker-       |              |
| CBF                      | 2                           | 0           | 0          | 0            | 0           | 1            | 0           | 0          | 0            | 6             | 9<br>(2.3)   |
| NPM1                     | 0                           | 26          | 0          | 9            | 2           | 0            | 0           | 0          | 4            | 5             | 46<br>(11.7) |
| MLL                      | 0                           | 0           | 7          | 1            | 0           | 0            | 0           | 0          | 1            | 2             | 11<br>(2.8)  |
| IDH2                     | 0                           | 0           | 0          | 42           | 0           | 0            | 0           | 0          | 1            | 2             | 45<br>(11.4) |
| IDH1                     | 0                           | 1           | 0          | 0            | 9           | 0            | 0           | 0          | 10           | 3             | 23<br>(5.8)  |
| TP53                     | 0                           | 0           | 0          | 0            | 0           | 58           | 0           | 0          | 0            | 18            | 76<br>(19.2) |
| Complex                  | 0                           | 0           | 0          | 0            | 0           | 0            | 15          | 0          | 4            | 12            | 31<br>(7.9)  |
| FLT3                     | 0                           | 1           | 0          | 0            | 0           | 0            | 0           | 7          | 2            | 17            | 27<br>(6.8)  |
| TET2 / WT1               | 0                           | 1           | 0          | 0            | 0           | 0            | 0           | 0          | 42           | 6             | 49<br>(12.4) |
| Marker-                  | 0                           | 0           | 0          | 2            | 0           | 1            | 0           | 0          | 0            | 75            | 78<br>(19.8) |
| Total                    | 2<br>(0.5)                  | 29<br>(7.3) | 7<br>(1.8) | 54<br>(13.7) | 11<br>(2.8) | 60<br>(15.2) | 15<br>(3.8) | 7<br>(1.8) | 64<br>(16.2) | 146<br>(37.0) | 395<br>(100) |

**Supplementary Table 6. Treatment Assignments for All 224 Eligible Patients Treated on a Beat AML Sub-study**

| Prioritized Schema Group | Actual Treatment Assignment |             |            |              |            |              |            |            |              |              | Total        |
|--------------------------|-----------------------------|-------------|------------|--------------|------------|--------------|------------|------------|--------------|--------------|--------------|
|                          | CBF                         | NPM1        | MLL        | IDH2         | IDH1       | TP53         | Complex    | FLT3       | TET2 / WT1   | Marker-      |              |
| CBF                      | 2                           | 0           | 0          | 0            | 0          | 1            | 0          | 0          | 0            | 2            | 5<br>(2.2)   |
| NPM1                     | 0                           | 15          | 0          | 8            | 2          | 0            | 0          | 0          | 2            | 3            | 30<br>(13.4) |
| MLL                      | 0                           | 0           | 1          | 1            | 0          | 0            | 0          | 0          | 1            | 1            | 4<br>(1.8)   |
| IDH2                     | 0                           | 0           | 0          | 28           | 0          | 0            | 0          | 0          | 0            | 1            | 29<br>(13.0) |
| IDH1                     | 0                           | 1           | 0          | 0            | 5          | 0            | 0          | 0          | 4            | 0            | 10<br>(4.5)  |
| TP53                     | 0                           | 0           | 0          | 0            | 0          | 37           | 0          | 0          | 0            | 5            | 42<br>(18.8) |
| Complex                  | 0                           | 0           | 0          | 0            | 0          | 0            | 7          | 0          | 3            | 7            | 17<br>(7.6)  |
| FLT3                     | 0                           | 1           | 0          | 0            | 0          | 0            | 0          | 4          | 0            | 10           | 15<br>(6.7)  |
| TET2 / WT1               | 0                           | 1           | 0          | 0            | 0          | 0            | 0          | 0          | 22           | 3            | 26<br>(11.6) |
| Marker-                  | 0                           | 0           | 0          | 2            | 0          | 0            | 0          | 0          | 0            | 44           | 46<br>(20.5) |
| Total                    | 2<br>(0.9)                  | 18<br>(8.0) | 1<br>(0.5) | 39<br>(17.4) | 7<br>(3.1) | 38<br>(17.0) | 7<br>(3.1) | 4<br>(1.8) | 32<br>(14.3) | 76<br>(33.9) | 224<br>(100) |

**Supplementary Table 7. Percentage of eligible Beat AML Patients with mutations in common genes**

| <b>Gene</b> | <b>Percentage (%)</b> |
|-------------|-----------------------|
| TP53        | 26                    |
| DNMT3A      | 24                    |
| IDH2        | 22.5                  |
| SRSF2       | 22.5                  |
| ASXL1       | 22.5                  |
| RUNX1       | 20.6                  |
| NPM1        | 20.1                  |
| NRAS        | 18.1                  |
| TET2        | 17.2                  |
| FLT3        | 15.7                  |
| PTPN11      | 14.2                  |
| STAG2       | 12.7                  |
| CEBPA       | 8.8                   |
| IDH1        | 7.8                   |
| SF3B1       | 7.4                   |
| BCOR        | 6.9                   |
| U2AF1       | 6.9                   |
| KRAS        | 6.9                   |
| NF1         | 6.4                   |
| JAK2        | 5.4                   |
| EZH2        | 3.4                   |
| GATA2       | 3.4                   |
| PHF6        | 3.4                   |
| CBL         | 2.9                   |
| WT1         | 2.9                   |
| BCORL1      | 2.9                   |
| SETBP1      | 2.5                   |
| MUTYH       | 2                     |
| MLL2        | 2                     |
| CHEK2       | 2                     |

**Supplementary Table 8. Most commonly mutated genes across the different Beat AML groups compared to previous studies**

| Gene   | Papaemmanuil et al. | AML TCGA | Beat AML/ Oregon | Beat AML Consented Patients | Beat AML Eligible Patients | Beat AML Patients Treated on Sub-study | Beat AML Consented Patients with VAF>30 | Beat AML Eligible Patients with VAF>30 | Beat AML Patients Treated on Sub-study with VAF>30 |
|--------|---------------------|----------|------------------|-----------------------------|----------------------------|----------------------------------------|-----------------------------------------|----------------------------------------|----------------------------------------------------|
| TP53   | 7.15                | 8        | 8.7              | 26.69                       | 26.45                      | 26.34                                  | 17.86                                   | 19.14                                  | 18.30                                              |
| DNMT3A | 25.64               | 24.5     | 22.3             | 25.87                       | 27.96                      | 28.57                                  | 20.53                                   | 22.67                                  | 22.77                                              |
| ASXL1  | 5.03                | 2.5      | 7.9              | 23.82                       | 23.43                      | 24.11                                  | 19.51                                   | 19.14                                  | 19.64                                              |
| TET2   | 11.05               | 8.5      | 12.2             | 23.00                       | 23.17                      | 21.88                                  | 19.51                                   | 19.65                                  | 18.75                                              |
| RUNX1  | 9.7                 | 13       | 12.5             | 21.56                       | 22.92                      | 25.45                                  | 14.78                                   | 15.62                                  | 15.63                                              |
| SRSF2  | 6.59                | NA       | 11.4             | 21.15                       | 21.91                      | 24.11                                  | 17.66                                   | 18.39                                  | 20.54                                              |
| NRAS   | 19.12               | 7.5      | 12.4             | 18.48                       | 18.64                      | 17.86                                  | 6.16                                    | 6.30                                   | 4.46                                               |
| FLT3   | 36.47               | 28       | 28.8             | 16.84                       | 18.39                      | 17.41                                  | 4.52                                    | 4.28                                   | 5.36                                               |
| NPM1   | 31.16               | 27       | 21.7             | 16.63                       | 19.14                      | 19.64                                  | 11.50                                   | 13.60                                  | 14.29                                              |
| IDH2   | 10.69               | 10       | 11.9             | 16.02                       | 18.64                      | 22.77                                  | 11.91                                   | 14.11                                  | 17.41                                              |
| MLL    | 5.59                | NA       | NA               | 12.53                       | 13.60                      | 14.29                                  | 4.11                                    | 4.53                                   | 5.80                                               |
| PTPN11 | 8.5                 | 4.5      | 4.7              | 10.68                       | 11.34                      | 13.84                                  | 3.49                                    | 4.03                                   | 4.91                                               |
| STAG2  | 4.75                | 3        | 5.3              | 10.27                       | 11.08                      | 12.95                                  | 5.95                                    | 6.05                                   | 7.14                                               |
| IDH1   | 7.51                | 9.5      | 8.7              | 10.06                       | 11.08                      | 8.48                                   | 6.98                                    | 7.81                                   | 7.14                                               |
| BCOR   | 2.55                | NA       | 5.5              | 9.65                        | 9.57                       | 8.93                                   | 7.39                                    | 7.05                                   | 7.14                                               |
| KRAS   | 5.59                | 4        | 4                | 9.03                        | 8.82                       | 6.70                                   | 1.85                                    | 2.02                                   | 1.34                                               |
| U2AF1  | 2.62                | 4        | 4.7              | 8.83                        | 8.56                       | 6.70                                   | 5.75                                    | 6.05                                   | 3.57                                               |
| JAK2   | 0.78                | NA       | 4.5              | 8.42                        | 7.30                       | 6.25                                   | 4.72                                    | 4.03                                   | 3.57                                               |
| CEBPA  | 9.77                | 6.5      | 5.3              | 7.80                        | 8.82                       | 9.38                                   | 4.93                                    | 5.54                                   | 5.36                                               |

|                |      |     |     |      |      |      |      |      |      |
|----------------|------|-----|-----|------|------|------|------|------|------|
| <b>EZH2</b>    | 3.26 | 1.5 | 3.5 | 6.57 | 6.05 | 5.80 | 5.34 | 4.79 | 5.36 |
| <b>GATA2</b>   | 2.62 | 1   | 4   | 6.37 | 6.55 | 8.48 | 3.08 | 3.02 | 3.57 |
| <b>SF3B1</b>   | 2.83 | NA  | 5.1 | 6.37 | 5.79 | 7.59 | 3.90 | 3.53 | 4.91 |
| <b>KMT2A</b>   | NA   | 5   | NA  | 3.90 | 4.53 | 3.57 | 0.00 | 0.00 | 0.00 |
| <b>WT1</b>     | 5.45 | 6   | 9   | 3.90 | 3.78 | 4.02 | 2.87 | 2.52 | 3.13 |
| <b>KIT</b>     | 4.67 | 4   | 1.8 | 2.67 | 3.27 | 4.46 | 2.26 | 2.77 | 4.02 |
| <b>RAD21</b>   | 3.82 | 2   | 2.6 | 2.26 | 2.02 | 1.34 | 1.03 | 1.26 | 1.34 |
| <b>RUNX1T1</b> | NA   | 4   | NA  | 2.26 | 1.76 | 1.79 | 1.44 | 1.26 | 1.34 |
| <b>MYH11</b>   | NA   | 5   | NA  | 1.64 | 1.76 | 1.79 | 0.00 | 0.00 | 0.00 |
| <b>RARA</b>    | NA   | 8   | NA  | 1.23 | 1.26 | 0.89 | 0.82 | 1.01 | 0.45 |
| <b>CBFB</b>    | NA   | 6   | NA  | 0.00 | 0.00 | 0.00 | 0.00 | 0.00 | 0.00 |
| <b>PML</b>     | NA   | 8   | NA  | 0.00 | 0.00 | 0.00 | 0.00 | 0.00 | 0.00 |



**Supplementary Table 9. Multivariable models for overall survival that controlled for demographic, clinical and molecular variables.** Modeling was performed on a dataset with 395 patients and 194 events. Multiple imputation estimated missing data. Log hazards and standard errors for each variable were estimated using Cox proportional hazards models for each of 10 imputed datasets. Estimates of log hazards and standard errors were combined across the imputed datasets. Hazard ratios with 95% confidence intervals were obtained from the log hazards and standard errors. P-values from two-sided t-tests are provided. P-values were not adjusted for multiple testing.

| Variable                                             | Univariable Models |             |        | Full Multivariable Model |             |        |
|------------------------------------------------------|--------------------|-------------|--------|--------------------------|-------------|--------|
|                                                      | Hazard Ratio       | 95% CI      | P      | Hazard Ratio             | 95% CI      | P      |
| <b>Standard vs Beat AML Therapy</b>                  |                    |             |        |                          |             |        |
| <b>Before 3 months</b>                               | 3.33               | 2.12-5.24   | <.0001 | 2.86                     | 1.77-4.61   | <.0001 |
| <b>After 3 months</b>                                | 1.27               | 0.73-2.20   | 0.3970 | 1.13                     | 0.63-2.03   | 0.6747 |
| <b>Investigational vs Beat AML Therapy</b>           | 0.68               | 0.36-1.26   | 0.2202 | 0.65                     | 0.33-1.31   | 0.2283 |
| <b>Palliative Care vs Beat AML Therapy</b>           |                    |             |        |                          |             |        |
| <b>Before 1 month</b>                                | 28.70              | 15.66-52.58 | <.0001 | 26.67                    | 13.77-51.67 | <.0001 |
| <b>After 1 month</b>                                 | 2.32               | 1.08-5.02   | 0.0320 | 2.30                     | 0.98-5.40   | 0.0556 |
| <b>Age (5-year increase)</b>                         | 1.27               | 1.14-1.41   | <.0001 | 1.22                     | 1.09-1.37   | 0.0007 |
| <b>Female vs Male</b>                                | 0.78               | 0.58-1.04   | 0.0844 | 0.85                     | 0.6-1.21    | 0.3618 |
| <b>Non-white vs White</b>                            | 0.73               | 0.43-1.23   | 0.2326 | 0.86                     | 0.48-1.54   | 0.6065 |
| <b>ECOG PS 2+ vs 0/1</b>                             | 2.27               | 1.68-3.07   | <.0001 | 1.89                     | 1.34-2.65   | 0.0003 |
| <b>Hemoglobin (1-unit increase)</b>                  | 0.89               | 0.81-0.98   | 0.0173 | 0.96                     | 0.86-1.07   | 0.4470 |
| <b>Platelet (50-unit increase)</b>                   | 0.94               | 0.86-1.03   | 0.1762 | 0.98                     | 0.89-1.08   | 0.7190 |
| <b>WBC (50-unit increase)</b>                        | 1.27               | 1.05-1.54   | 0.0153 | 1.28                     | 0.97-1.69   | 0.0816 |
| <b>%Blood Blasts (10-unit increase)</b>              | 1.04               | 0.99-1.09   | 0.1051 | 0.98                     | 0.91-1.06   | 0.6430 |
| <b>%Bone Marrow Blasts (10-unit increase)</b>        | 1.07               | 1.01-1.14   | 0.0245 | 1.14                     | 1.05-1.24   | 0.0017 |
| <b>Alanine Aminotransferase (10-unit increase)</b>   | 1.04               | 0.97-1.11   | 0.3016 | 1.03                     | 0.9-1.17    | 0.6895 |
| <b>Aspartate Aminotransferase (10-unit increase)</b> | 1.06               | 1.01-1.11   | 0.0310 | 0.97                     | 0.86-1.10   | 0.6413 |
| <b>Total Bilirubin (0.2-unit increase)</b>           | 1.05               | 1.02-1.08   | 0.0011 | 1.05                     | 1.01-1.09   | 0.0157 |
| <b>Creatinine (0.2-unit increase)</b>                | 1.11               | 1.04-1.19   | 0.0022 | 1.08                     | 0.99-1.17   | 0.0882 |
| <b>Treatment-related AML: Yes vs No</b>              | 1.34               | 0.94-1.92   | 0.1092 | 1.31                     | 0.87-1.97   | 0.1960 |
| <b>CBF: Present vs Absent</b>                        | 0.28               | 0.04-1.82   | 0.1846 | 0.23                     | 0.03-1.61   | 0.1401 |

|                                             |      |           |        |      |           |        |
|---------------------------------------------|------|-----------|--------|------|-----------|--------|
| <b>MLL: Present vs Absent</b>               | 2.80 | 1.36-5.74 | 0.0053 | 2.17 | 0.95-4.96 | 0.0674 |
| <b>Complex Karyotype: Present vs Absent</b> | 2.25 | 1.68-3.01 | <.0001 | 1.26 | 0.8-1.98  | 0.3272 |
| <b>NPM1: Mutated vs Wild-type</b>           | 0.78 | 0.53-1.15 | 0.2132 | 0.56 | 0.34-0.94 | 0.0277 |
| <b>IDH2: Mutated vs Wild-type</b>           | 0.60 | 0.39-0.91 | 0.0173 | 0.79 | 0.47-1.34 | 0.3887 |
| <b>IDH1: Mutated vs Wild-type</b>           | 0.75 | 0.44-1.27 | 0.2790 | 1.18 | 0.62-2.26 | 0.6173 |
| <b>TP53: Mutated vs Wild-type</b>           | 2.11 | 1.54-2.89 | <.0001 | 2.47 | 1.51-4.04 | 0.0004 |
| <b>FLT3 ITD: Present vs Absent</b>          | 1.59 | 1.04-2.44 | 0.0342 | 1.36 | 0.82-2.28 | 0.2384 |
| <b>FLT3 TKD: Mutated vs Wild-type</b>       | 1.10 | 0.49-2.49 | 0.8151 | 1.54 | 0.61-3.9  | 0.3646 |
| <b>FLT3 Other: Mutated vs Wild-type</b>     | 1.78 | 0.57-5.58 | 0.3214 | 0.91 | 0.25-3.34 | 0.8875 |
| <b>TET2: Mutated vs Wild-type</b>           | 1.21 | 0.87-1.68 | 0.2635 | 1.39 | 0.94-2.07 | 0.1021 |
| <b>WT1: Mutated vs Wild-type</b>            | 1.29 | 0.61-2.75 | 0.5063 | 2.12 | 0.94-4.77 | 0.0702 |

**Supplementary Table 10. Models for overall survival including all eligible patients without adverse events of special interest.** Modeling was performed on a dataset with 369 patients and 174 events. Multiple imputation estimated missing data. Log hazards and standard errors for each variable were estimated using Cox proportional hazards models for each of 10 imputed datasets. Estimates of log hazards and standard errors were combined across the imputed datasets. Hazard ratios with 95% confidence intervals were obtained from the log hazards and standard errors. P-values from two-sided t-tests are provided. P-values were not adjusted for multiple testing.

| Variable                                             | Univariable Models |             |        | Full Multivariable Model |             |        |
|------------------------------------------------------|--------------------|-------------|--------|--------------------------|-------------|--------|
|                                                      | Hazard Ratio       | 95% CI      | P      | Hazard Ratio             | 95% CI      | P      |
| <b>Standard vs Beat AML Therapy</b>                  |                    |             |        |                          |             |        |
| <b>Before 3 months</b>                               | 2.90               | 1.78-4.73   | <.0001 | 2.48                     | 1.47-4.19   | 0.0008 |
| <b>After 3 months</b>                                | 1.06               | 0.58-1.92   | 0.8539 | 0.92                     | 0.49-1.74   | 0.7957 |
| <b>Investigational vs Beat AML Therapy</b>           | 0.67               | 0.36-1.26   | 0.2148 | 0.67                     | 0.33-1.33   | 0.2511 |
| <b>Palliative Care vs Beat AML Therapy</b>           |                    |             |        |                          |             |        |
| <b>Before 1 month</b>                                | 27.78              | 13.96-55.27 | <.0001 | 25.14                    | 11.74-53.85 | <.0001 |
| <b>After 1 month</b>                                 | 2.77               | 1.28-5.98   | 0.0096 | 2.93                     | 1.24-6.94   | 0.0149 |
| <b>Age (5-year increase)</b>                         | 1.28               | 1.15-1.43   | <.0001 | 1.25                     | 1.10-1.41   | 0.0004 |
| <b>Female vs Male</b>                                | 0.76               | 0.56-1.03   | 0.0776 | 0.83                     | 0.58-1.20   | 0.3300 |
| <b>Non-white vs White</b>                            | 0.75               | 0.43-1.29   | 0.2966 | 0.97                     | 0.52-1.78   | 0.9156 |
| <b>ECOG PS 2+ vs 0/1</b>                             | 2.33               | 1.69-3.22   | <.0001 | 2.13                     | 1.49-3.03   | <.0001 |
| <b>Hemoglobin (1-unit increase)</b>                  | 0.91               | 0.82-1.00   | 0.0523 | 0.98                     | 0.87-1.10   | 0.7015 |
| <b>Platelet (50-unit increase)</b>                   | 0.95               | 0.86-1.04   | 0.2582 | 0.98                     | 0.89-1.08   | 0.6480 |
| <b>WBC (50-unit increase)</b>                        | 1.21               | 0.97-1.50   | 0.0882 | 1.2                      | 0.89-1.62   | 0.2386 |
| <b>%Blood Blasts (10-unit increase)</b>              | 1.05               | 1.00-1.11   | 0.0457 | 1.02                     | 0.94-1.11   | 0.6312 |
| <b>%Bone Marrow Blasts (10-unit increase)</b>        | 1.05               | 0.98-1.12   | 0.1425 | 1.11                     | 1.01-1.21   | 0.0291 |
| <b>Alanine Aminotransferase (10-unit increase)</b>   | 1.00               | 0.92-1.09   | 0.9638 | 1.02                     | 0.88-1.18   | 0.8140 |
| <b>Aspartate Aminotransferase (10-unit increase)</b> | 1.04               | 0.97-1.10   | 0.2722 | 0.97                     | 0.85-1.10   | 0.6041 |
| <b>Total Bilirubin (0.2-unit increase)</b>           | 1.04               | 1.00-1.08   | 0.0327 | 1.05                     | 1.00-1.10   | 0.0544 |
| <b>Creatinine (0.2-unit increase)</b>                | 1.08               | 1.00-1.17   | 0.0532 | 1.04                     | 0.94-1.15   | 0.4498 |
| <b>Treatment-related AML: Yes vs No</b>              | 1.37               | 0.94-1.99   | 0.1042 | 1.36                     | 0.89-2.09   | 0.1588 |
| <b>CBF: Present vs Absent</b>                        | 0.27               | 0.04-1.93   | 0.1945 | 0.21                     | 0.03-1.69   | 0.1459 |

|                                             |      |           |        |      |           |        |
|---------------------------------------------|------|-----------|--------|------|-----------|--------|
| <b>MLL: Present vs Absent</b>               | 2.43 | 1.06-5.55 | 0.0365 | 2.05 | 0.81-5.18 | 0.1314 |
| <b>Complex Karyotype: Present vs Absent</b> | 2.30 | 1.69-3.13 | <.0001 | 1.35 | 0.84-2.19 | 0.2198 |
| <b>NPM1: Mutated vs Wild-type</b>           | 0.69 | 0.45-1.07 | 0.0956 | 0.53 | 0.3-0.92  | 0.0255 |
| <b>IDH2: Mutated vs Wild-type</b>           | 0.61 | 0.39-0.94 | 0.0266 | 0.79 | 0.46-1.36 | 0.3864 |
| <b>IDH1: Mutated vs Wild-type</b>           | 0.77 | 0.44-1.33 | 0.3422 | 1.18 | 0.6-2.29  | 0.6322 |
| <b>TP53: Mutated vs Wild-type</b>           | 2.17 | 1.56-3.02 | <.0001 | 2.21 | 1.31-3.71 | 0.0031 |
| <b>FLT3 ITD: Present vs Absent</b>          | 1.65 | 1.05-2.58 | 0.0284 | 1.48 | 0.86-2.55 | 0.1605 |
| <b>FLT3 TKD: Mutated vs Wild-type</b>       | 0.86 | 0.32-2.32 | 0.7678 | 1.49 | 0.47-4.72 | 0.5006 |
| <b>FLT3 Other: Mutated vs Wild-type</b>     | 2.04 | 0.65-6.41 | 0.2205 | 1.31 | 0.34-5.00 | 0.6908 |
| <b>TET2: Mutated vs Wild-type</b>           | 1.16 | 0.82-1.66 | 0.4042 | 1.36 | 0.89-2.08 | 0.1575 |
| <b>WT1: Mutated vs Wild-type</b>            | 1.44 | 0.67-3.07 | 0.3484 | 2.28 | 1.01-5.17 | 0.0485 |

**Supplementary Table 11. Models for overall survival including all eligible patients, landmarked at 15 days.** Modeling was performed on a dataset with 315 patients and 166 events. Multiple imputation estimated missing data. Log hazards and standard errors for each variable were estimated using Cox proportional hazards models for each of 10 imputed datasets. Estimates of log hazards and standard errors were combined across the imputed datasets. Hazard ratios with 95% confidence intervals were obtained from the log hazards and standard errors. P-values from two-sided t-tests are provided. P-values were not adjusted for multiple testing.

| Variable                                             | Univariable Models |            |        | Full Multivariable Model |            |        |
|------------------------------------------------------|--------------------|------------|--------|--------------------------|------------|--------|
|                                                      | Hazard Ratio       | 95% CI     | P      | Hazard Ratio             | 95% CI     | P      |
| <b>Standard vs Beat AML Therapy</b>                  |                    |            |        |                          |            |        |
| <b>Before 3 months</b>                               | 2.97               | 1.85-4.78  | <.0001 | 2.57                     | 1.55-4.26  | 0.0003 |
| <b>After 3 months</b>                                | 1.28               | 0.74-2.22  | 0.3823 | 1.14                     | 0.63-2.07  | 0.6589 |
| <b>Investigational vs Beat AML Therapy</b>           | 0.67               | 0.36-1.26  | 0.2148 | 0.66                     | 0.33-1.33  | 0.2445 |
| <b>Palliative Care vs Beat AML Therapy</b>           |                    |            |        |                          |            |        |
| <b>Before 1 month</b>                                | 14.65              | 6.59-32.55 | <.0001 | 13.59                    | 5.63-32.84 | <.0001 |
| <b>After 1 month</b>                                 | 2.29               | 1.06-4.96  | 0.0353 | 2.07                     | 0.86-4.99  | 0.1060 |
| <b>Age (5-year increase)</b>                         | 1.25               | 1.12-1.40  | <.0001 | 1.24                     | 1.09-1.4   | 0.0008 |
| <b>Female vs Male</b>                                | 0.78               | 0.57-1.07  | 0.1253 | 0.80                     | 0.54-1.19  | 0.2770 |
| <b>Non-white vs White</b>                            | 0.86               | 0.50-1.46  | 0.5672 | 1.08                     | 0.59-2     | 0.8016 |
| <b>ECOG PS 2+ vs 0/1</b>                             | 2.27               | 1.64-3.14  | <.0001 | 2.21                     | 1.52-3.21  | <.0001 |
| <b>Hemoglobin (1-unit increase)</b>                  | 0.92               | 0.84-1.02  | 0.1236 | 1.01                     | 0.9-1.13   | 0.8952 |
| <b>Platelet (50-unit increase)</b>                   | 0.95               | 0.87-1.04  | 0.2863 | 0.97                     | 0.88-1.07  | 0.5368 |
| <b>WBC (50-unit increase)</b>                        | 1.16               | 0.92-1.46  | 0.2105 | 1.06                     | 0.77-1.46  | 0.7385 |
| <b>%Blood Blasts (10-unit increase)</b>              | 1.05               | 1.00-1.10  | 0.0769 | 1.02                     | 0.94-1.11  | 0.6757 |
| <b>%Bone Marrow Blasts (10-unit increase)</b>        | 1.07               | 1.00-1.14  | 0.0558 | 1.14                     | 1.04-1.25  | 0.0081 |
| <b>Alanine Aminotransferase (10-unit increase)</b>   | 1.01               | 0.93-1.09  | 0.8051 | 1.03                     | 0.89-1.18  | 0.7216 |
| <b>Aspartate Aminotransferase (10-unit increase)</b> | 1.03               | 0.96-1.10  | 0.3870 | 0.95                     | 0.83-1.09  | 0.4838 |
| <b>Total Bilirubin (0.2-unit increase)</b>           | 1.04               | 1.00-1.08  | 0.0453 | 1.05                     | 1.00-1.10  | 0.0607 |
| <b>Creatinine (0.2-unit increase)</b>                | 1.07               | 0.99-1.16  | 0.0940 | 1.03                     | 0.93-1.14  | 0.5999 |
| <b>Treatment-related AML: Yes vs No</b>              | 1.40               | 0.95-2.05  | 0.0860 | 1.38                     | 0.90-2.12  | 0.1367 |
| <b>CBF: Present vs Absent</b>                        | 0.31               | 0.05-2.02  | 0.2240 | 0.25                     | 0.03-1.84  | 0.1757 |

|                                             |      |           |        |      |           |        |
|---------------------------------------------|------|-----------|--------|------|-----------|--------|
| <b>MLL: Present vs Absent</b>               | 2.35 | 0.97-5.69 | 0.0596 | 1.71 | 0.63-4.62 | 0.291  |
| <b>Complex Karyotype: Present vs Absent</b> | 2.09 | 1.52-2.88 | <.0001 | 1.33 | 0.82-2.17 | 0.2523 |
| <b>NPM1: Mutated vs Wild-type</b>           | 0.74 | 0.49-1.12 | 0.1571 | 0.63 | 0.36-1.08 | 0.0944 |
| <b>IDH2: Mutated vs Wild-type</b>           | 0.66 | 0.43-1.00 | 0.0521 | 0.72 | 0.41-1.24 | 0.2358 |
| <b>IDH1: Mutated vs Wild-type</b>           | 0.73 | 0.42-1.29 | 0.2847 | 1.14 | 0.56-2.30 | 0.7240 |
| <b>TP53: Mutated vs Wild-type</b>           | 1.87 | 1.32-2.67 | 0.0005 | 2.08 | 1.22-3.57 | 0.0080 |
| <b>FLT3 ITD: Present vs Absent</b>          | 1.61 | 1.02-2.55 | 0.0417 | 1.38 | 0.8-2.39  | 0.2526 |
| <b>FLT3 TKD: Mutated vs Wild-type</b>       | 1.01 | 0.42-2.47 | 0.9792 | 1.60 | 0.58-4.44 | 0.3651 |
| <b>FLT3 Other: Mutated vs Wild-type</b>     | 1.42 | 0.35-5.72 | 0.6251 | 1.26 | 0.23-6.86 | 0.7893 |
| <b>TET2: Mutated vs Wild-type</b>           | 1.15 | 0.8-1.64  | 0.4548 | 1.30 | 0.84-2.01 | 0.2331 |
| <b>WT1: Mutated vs Wild-type</b>            | 1.72 | 0.81-3.68 | 0.1596 | 2.42 | 1.06-5.50 | 0.0360 |

Supplementary Figure 1: Treatment assignment success rates by site with a reference line at 80% (the null unacceptable rate).

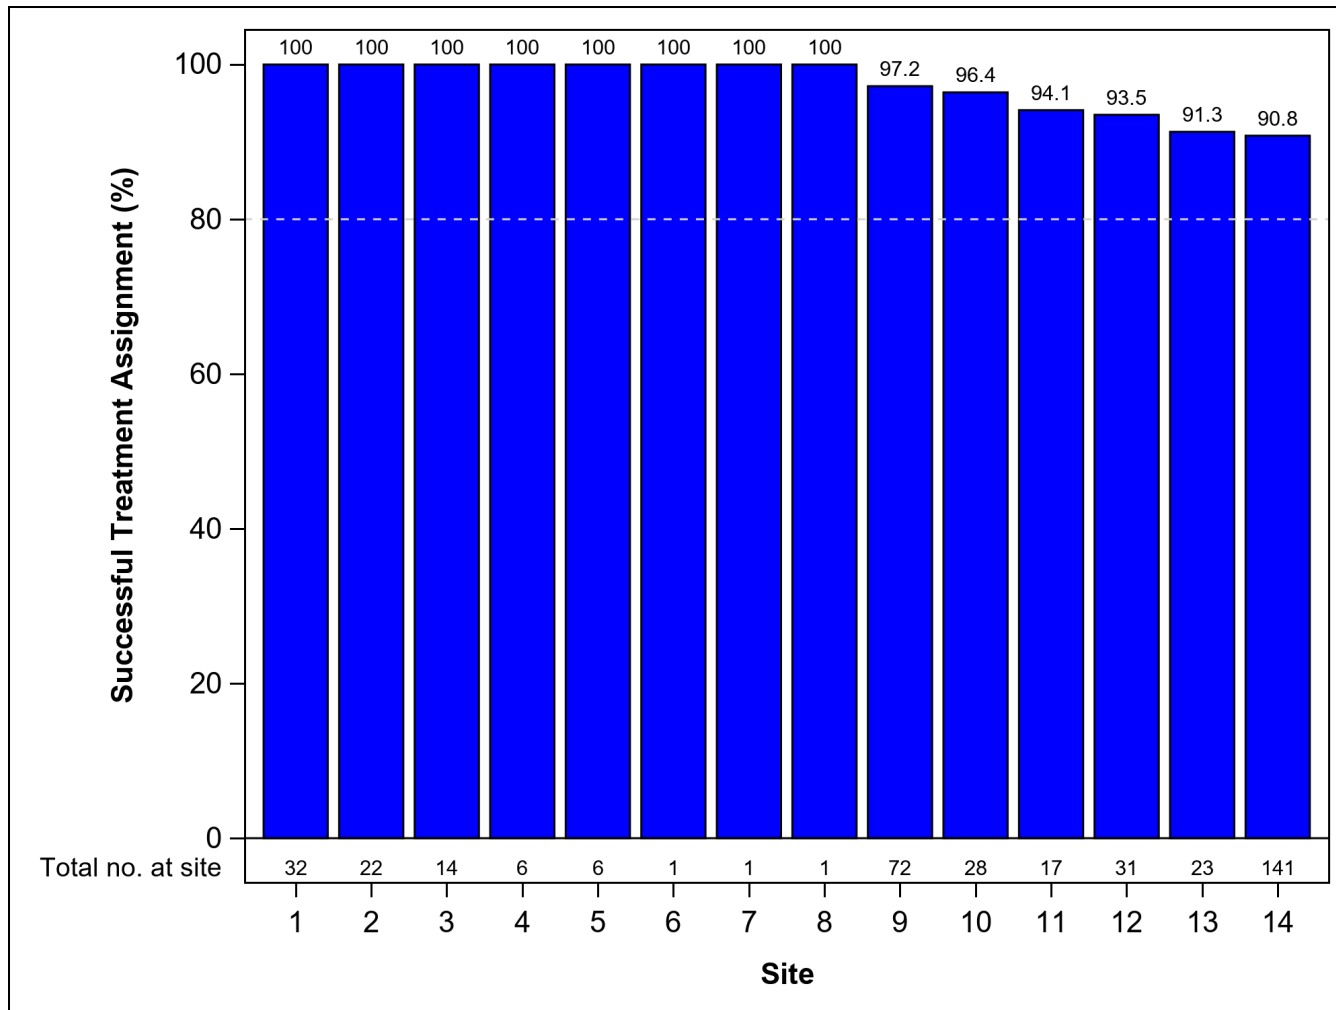

**Supplementary Figure 2. Co-mutation plots for patients enrolled in the trial under different molecular groups.** Each column represents an individual patient and each blue box indicates a genomic alteration is present at any VAF detected. Genes in with genomic alterations are listed in descending order of frequency and each column represents an individual patient. **A)** Co-mutation plot for all patients enrolled in the trial in the CBF molecular group (n= 9). **B)** Co-mutation plot for all patients enrolled in the trial in the NPM1 molecular group (n=46). **C)** Co-mutation plot for all patients enrolled in the trial in the MLL molecular group (n=11). **D)** Co-mutation plot for all patients enrolled in the trial in the IDH2 molecular group (n= 45). **E)** Co-mutation plot for all patients enrolled in the trial in the IDH1 molecular group (n= 23). **F)** Co-mutation plot for all patients enrolled in the trial in the TP53 molecular group (n=76). **G)** Co-mutation plot for all patients enrolled in the trial in the complex karyotype group (n= 31). **H)** Co-mutation plot for all patients enrolled in the trial in the FLT3 molecular group (n= 27). **I)** Co-mutation plot for all patients enrolled in the trial in the TET2/WT1 molecular group (n=49). **J)** Co-mutation plot for all patients enrolled in the trial in the Marker negative molecular group (n= 78).



A

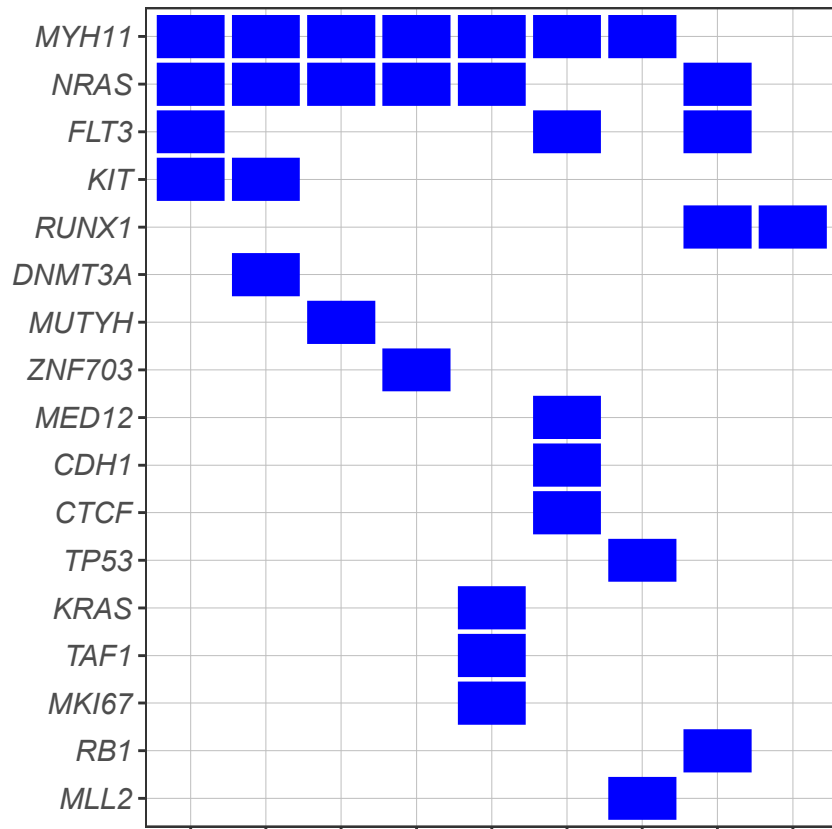

B

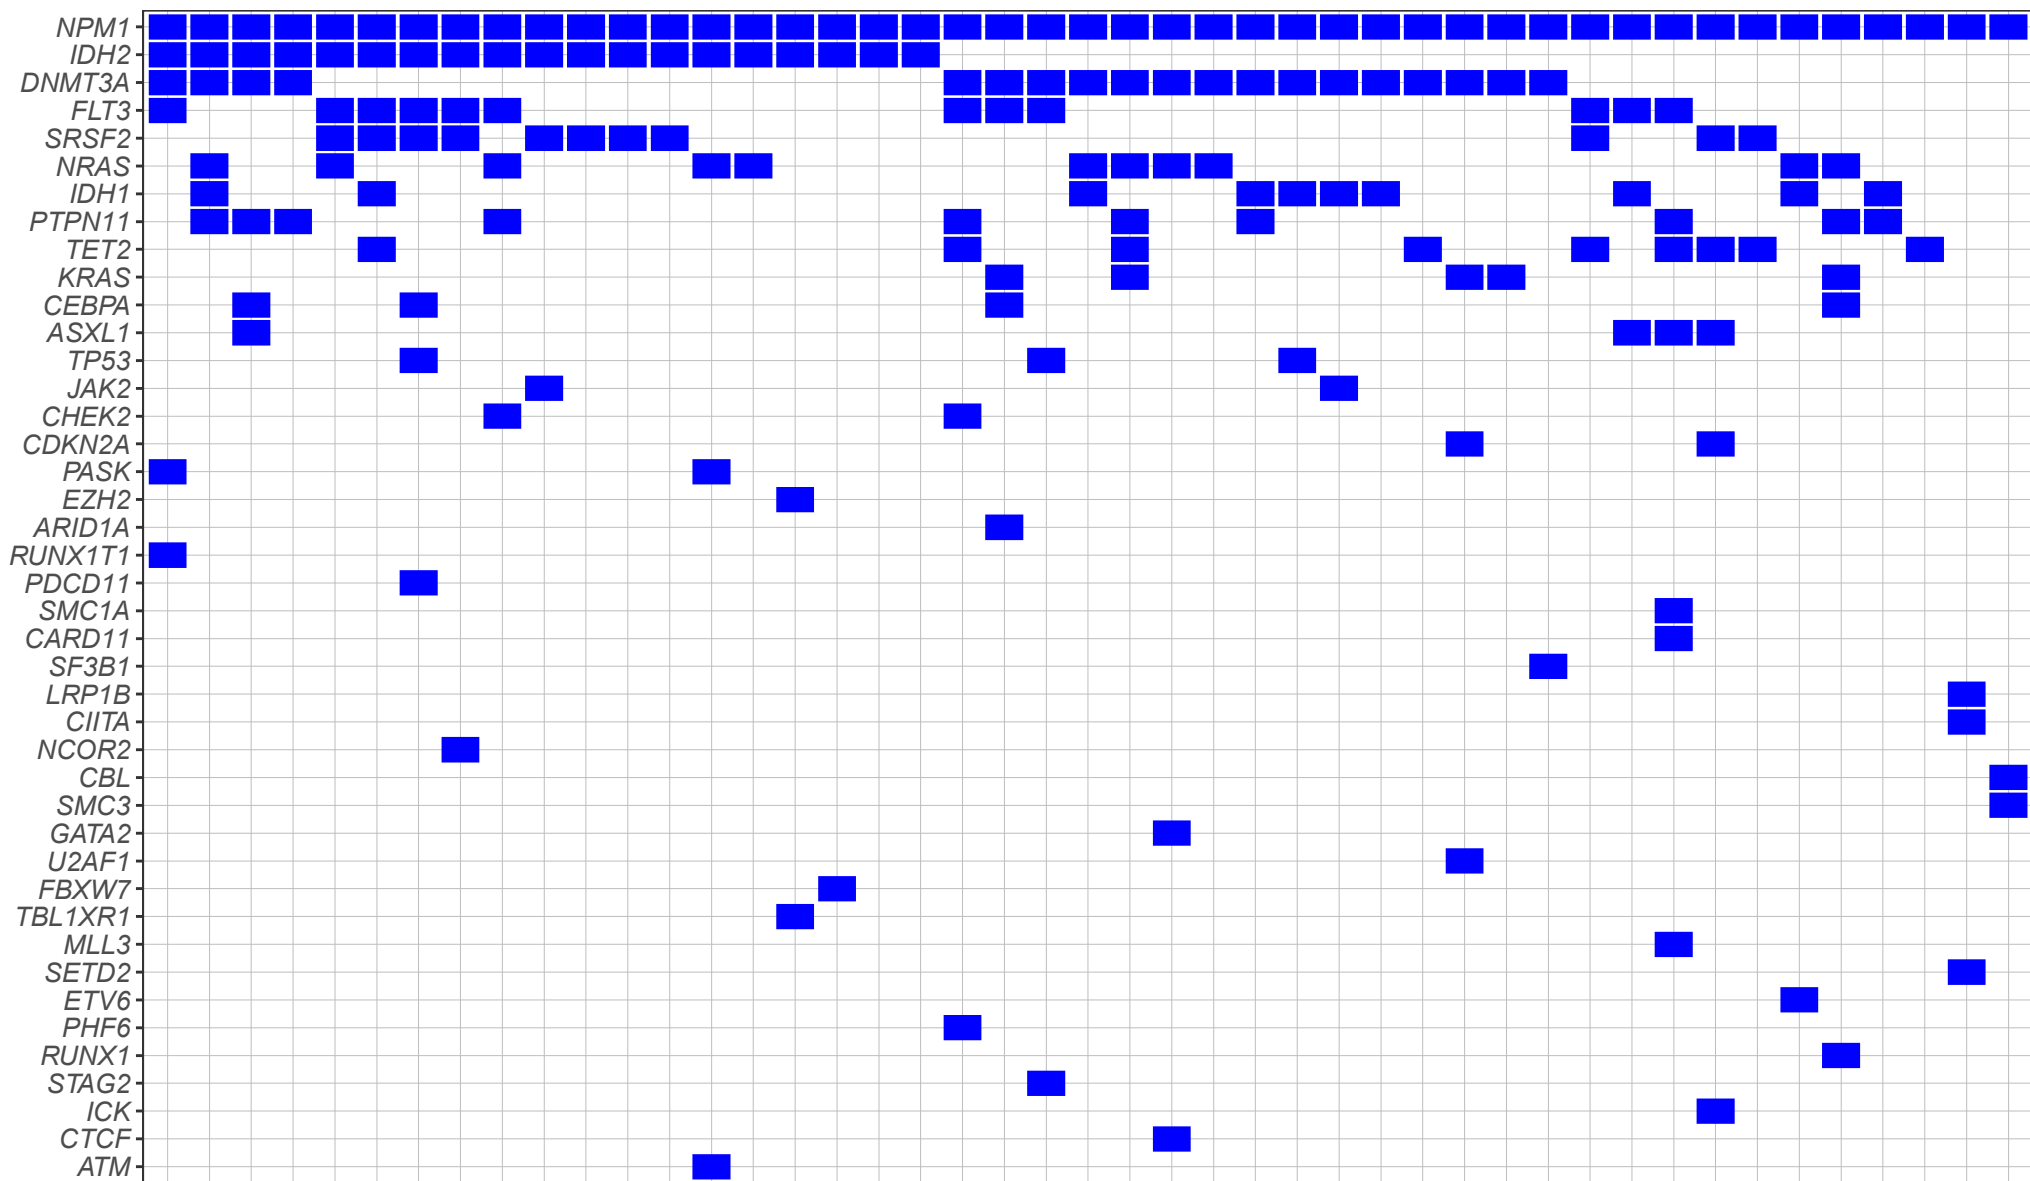



D

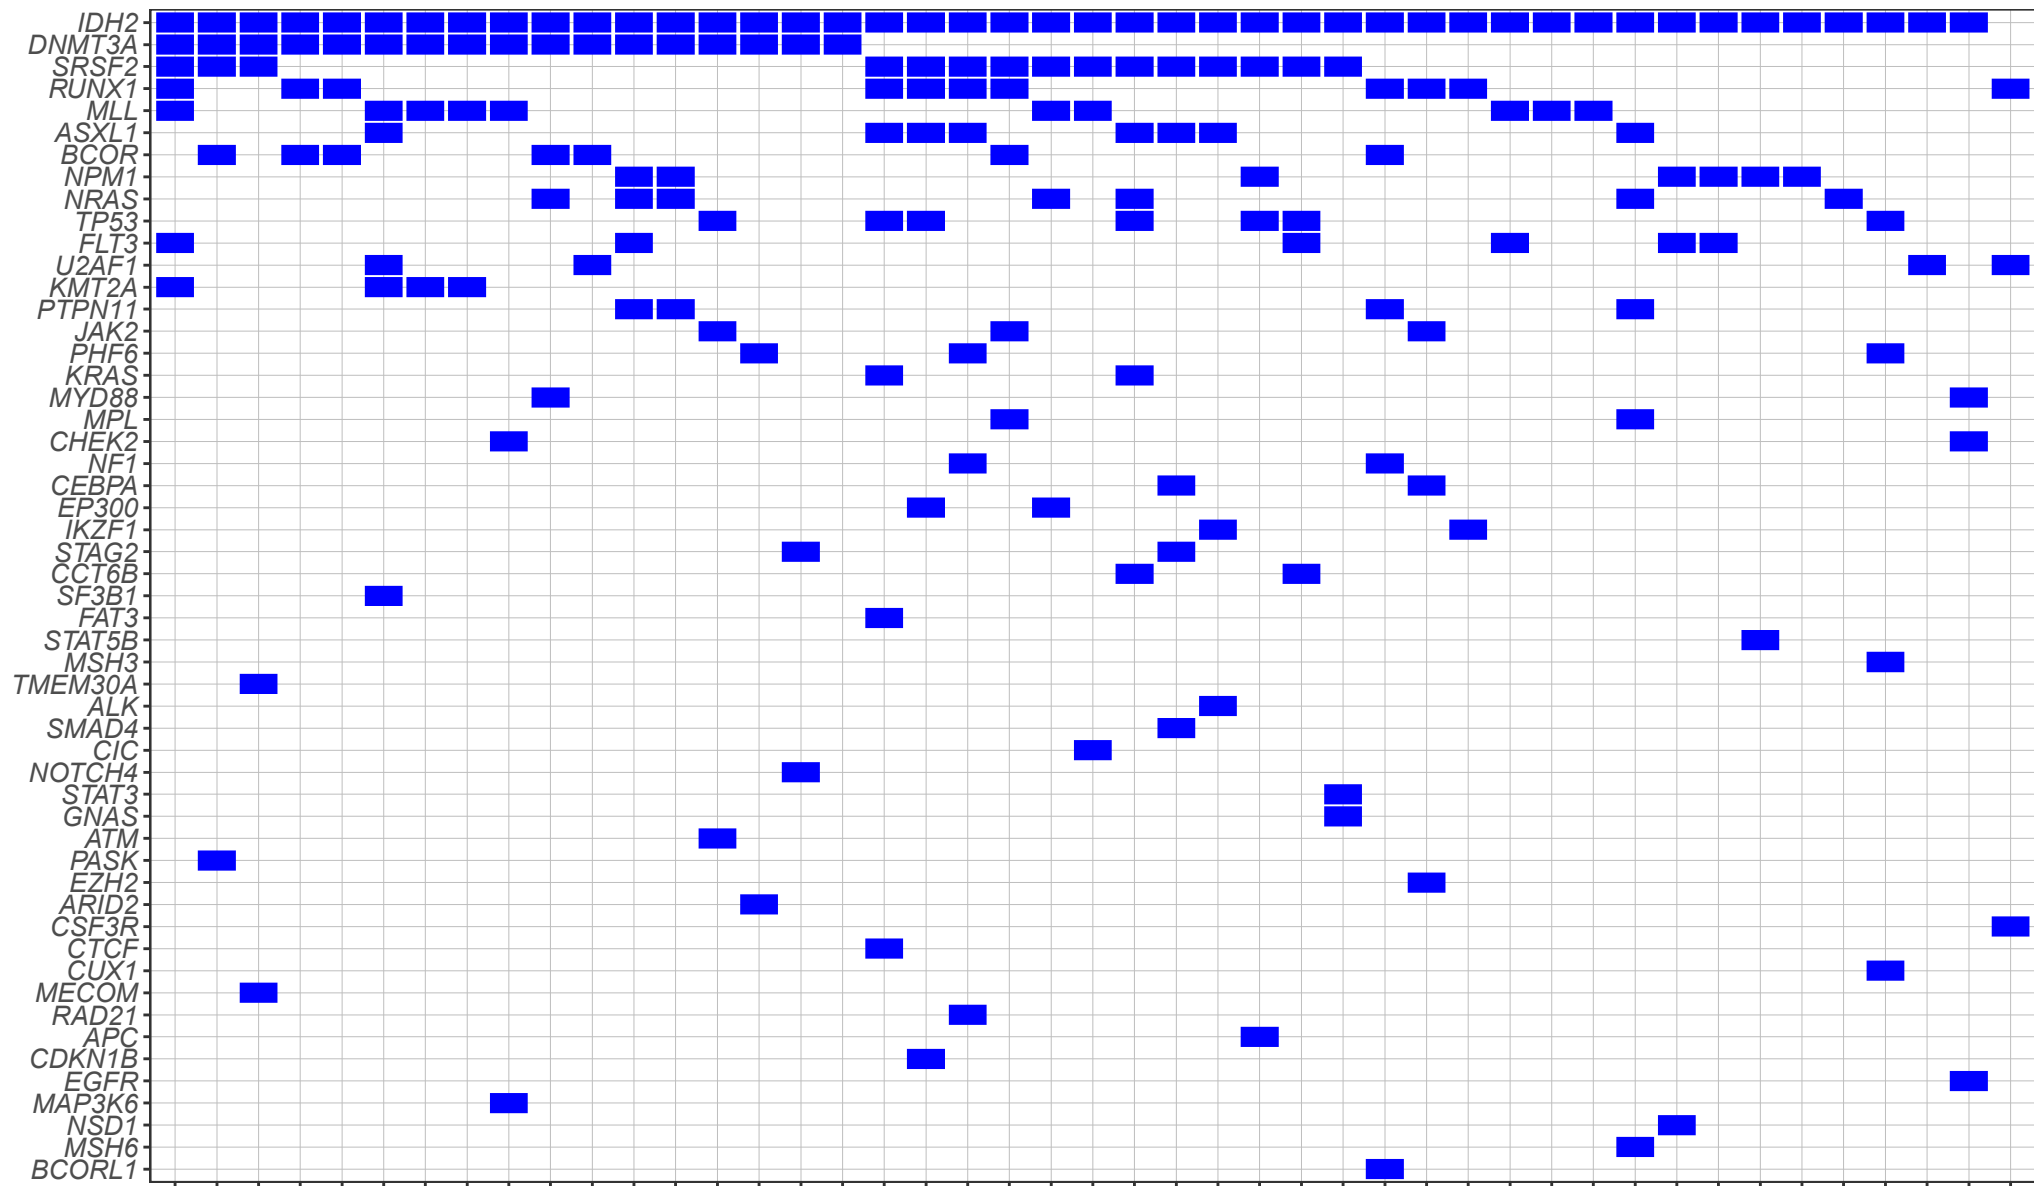



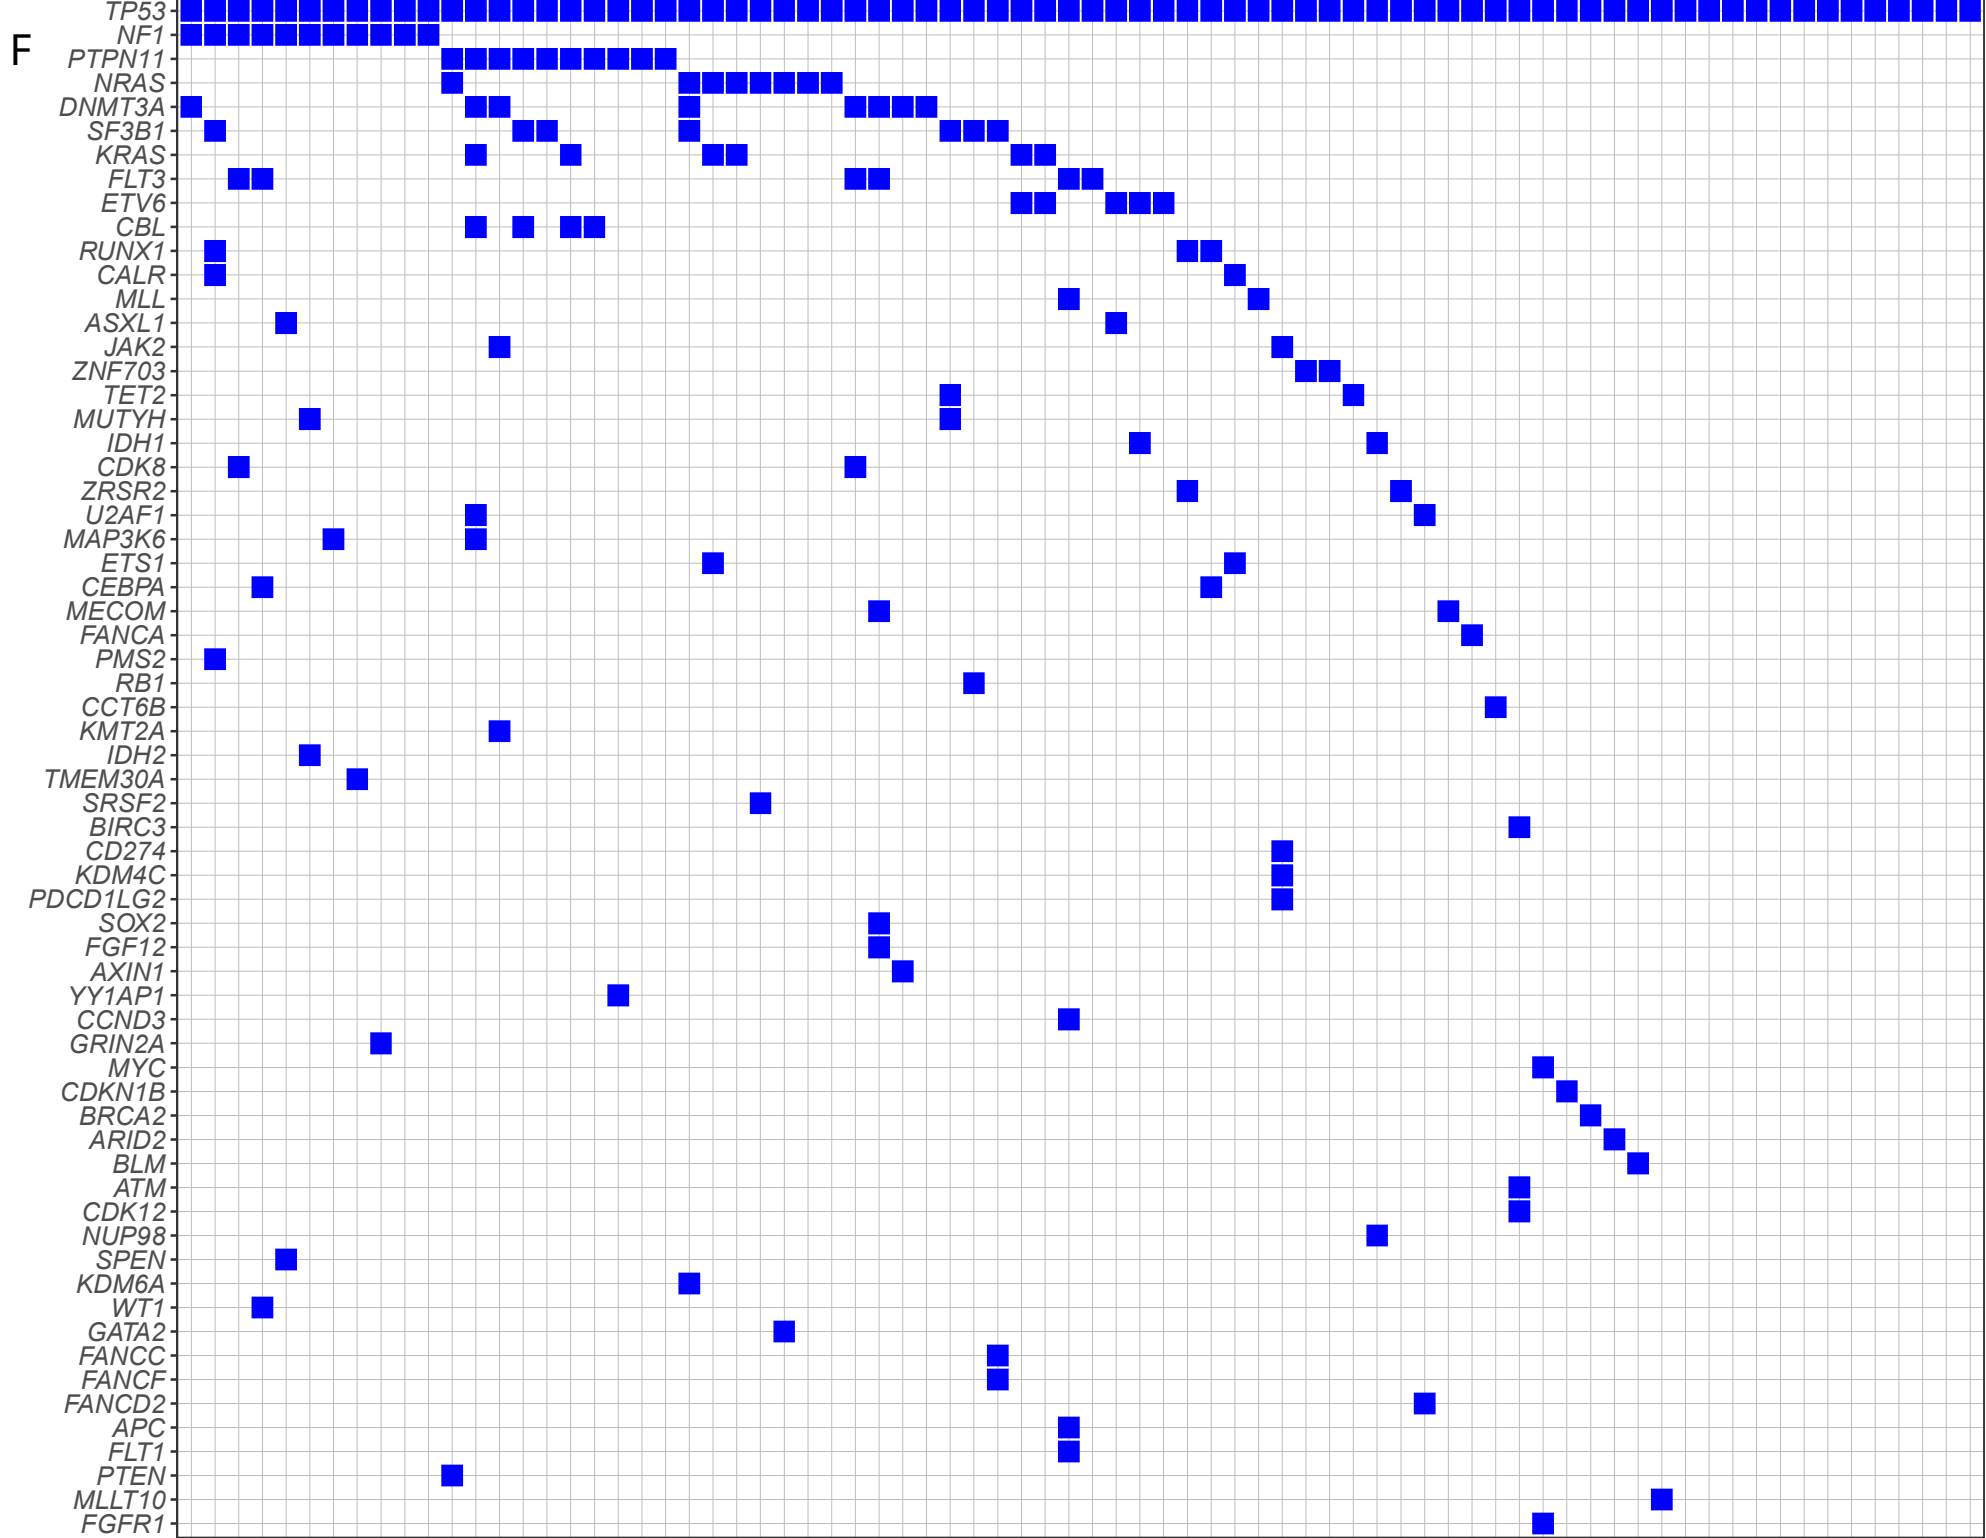

G

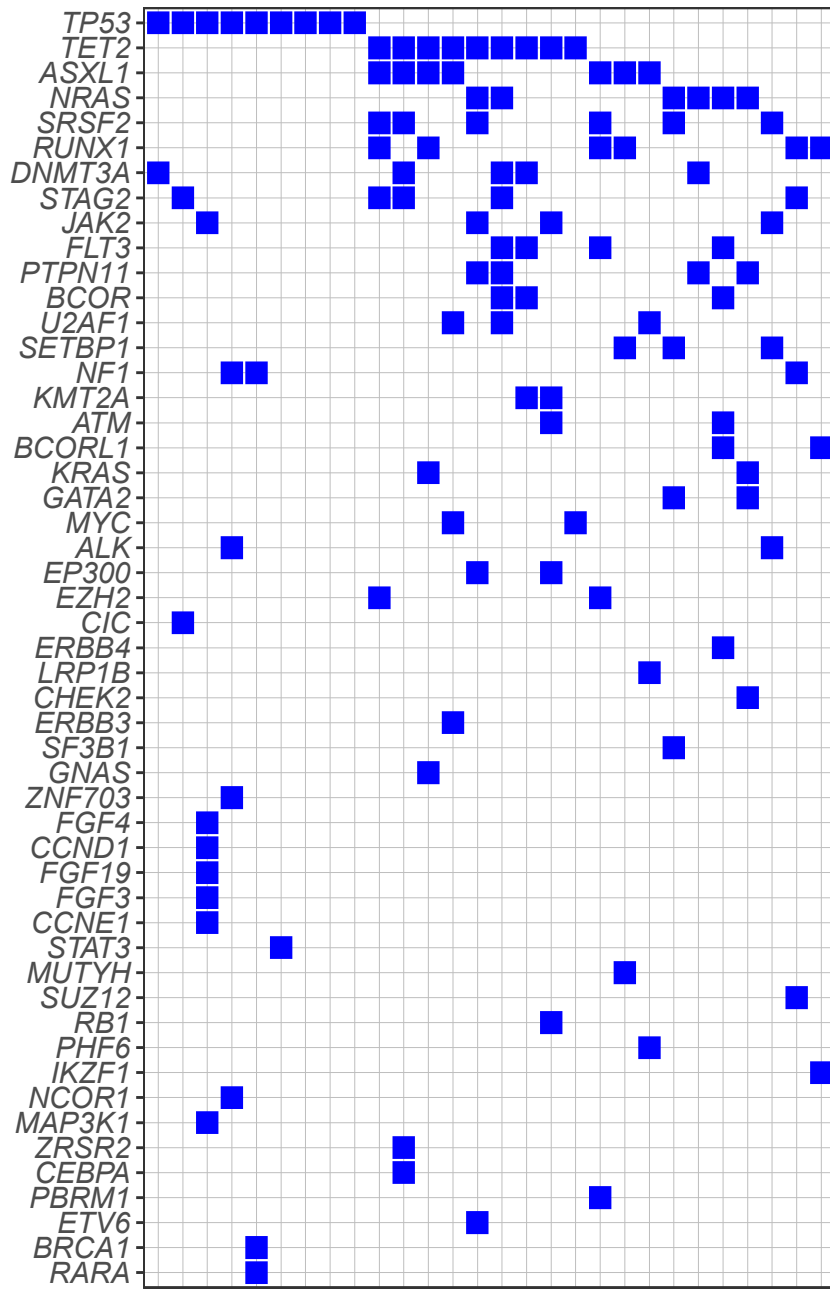





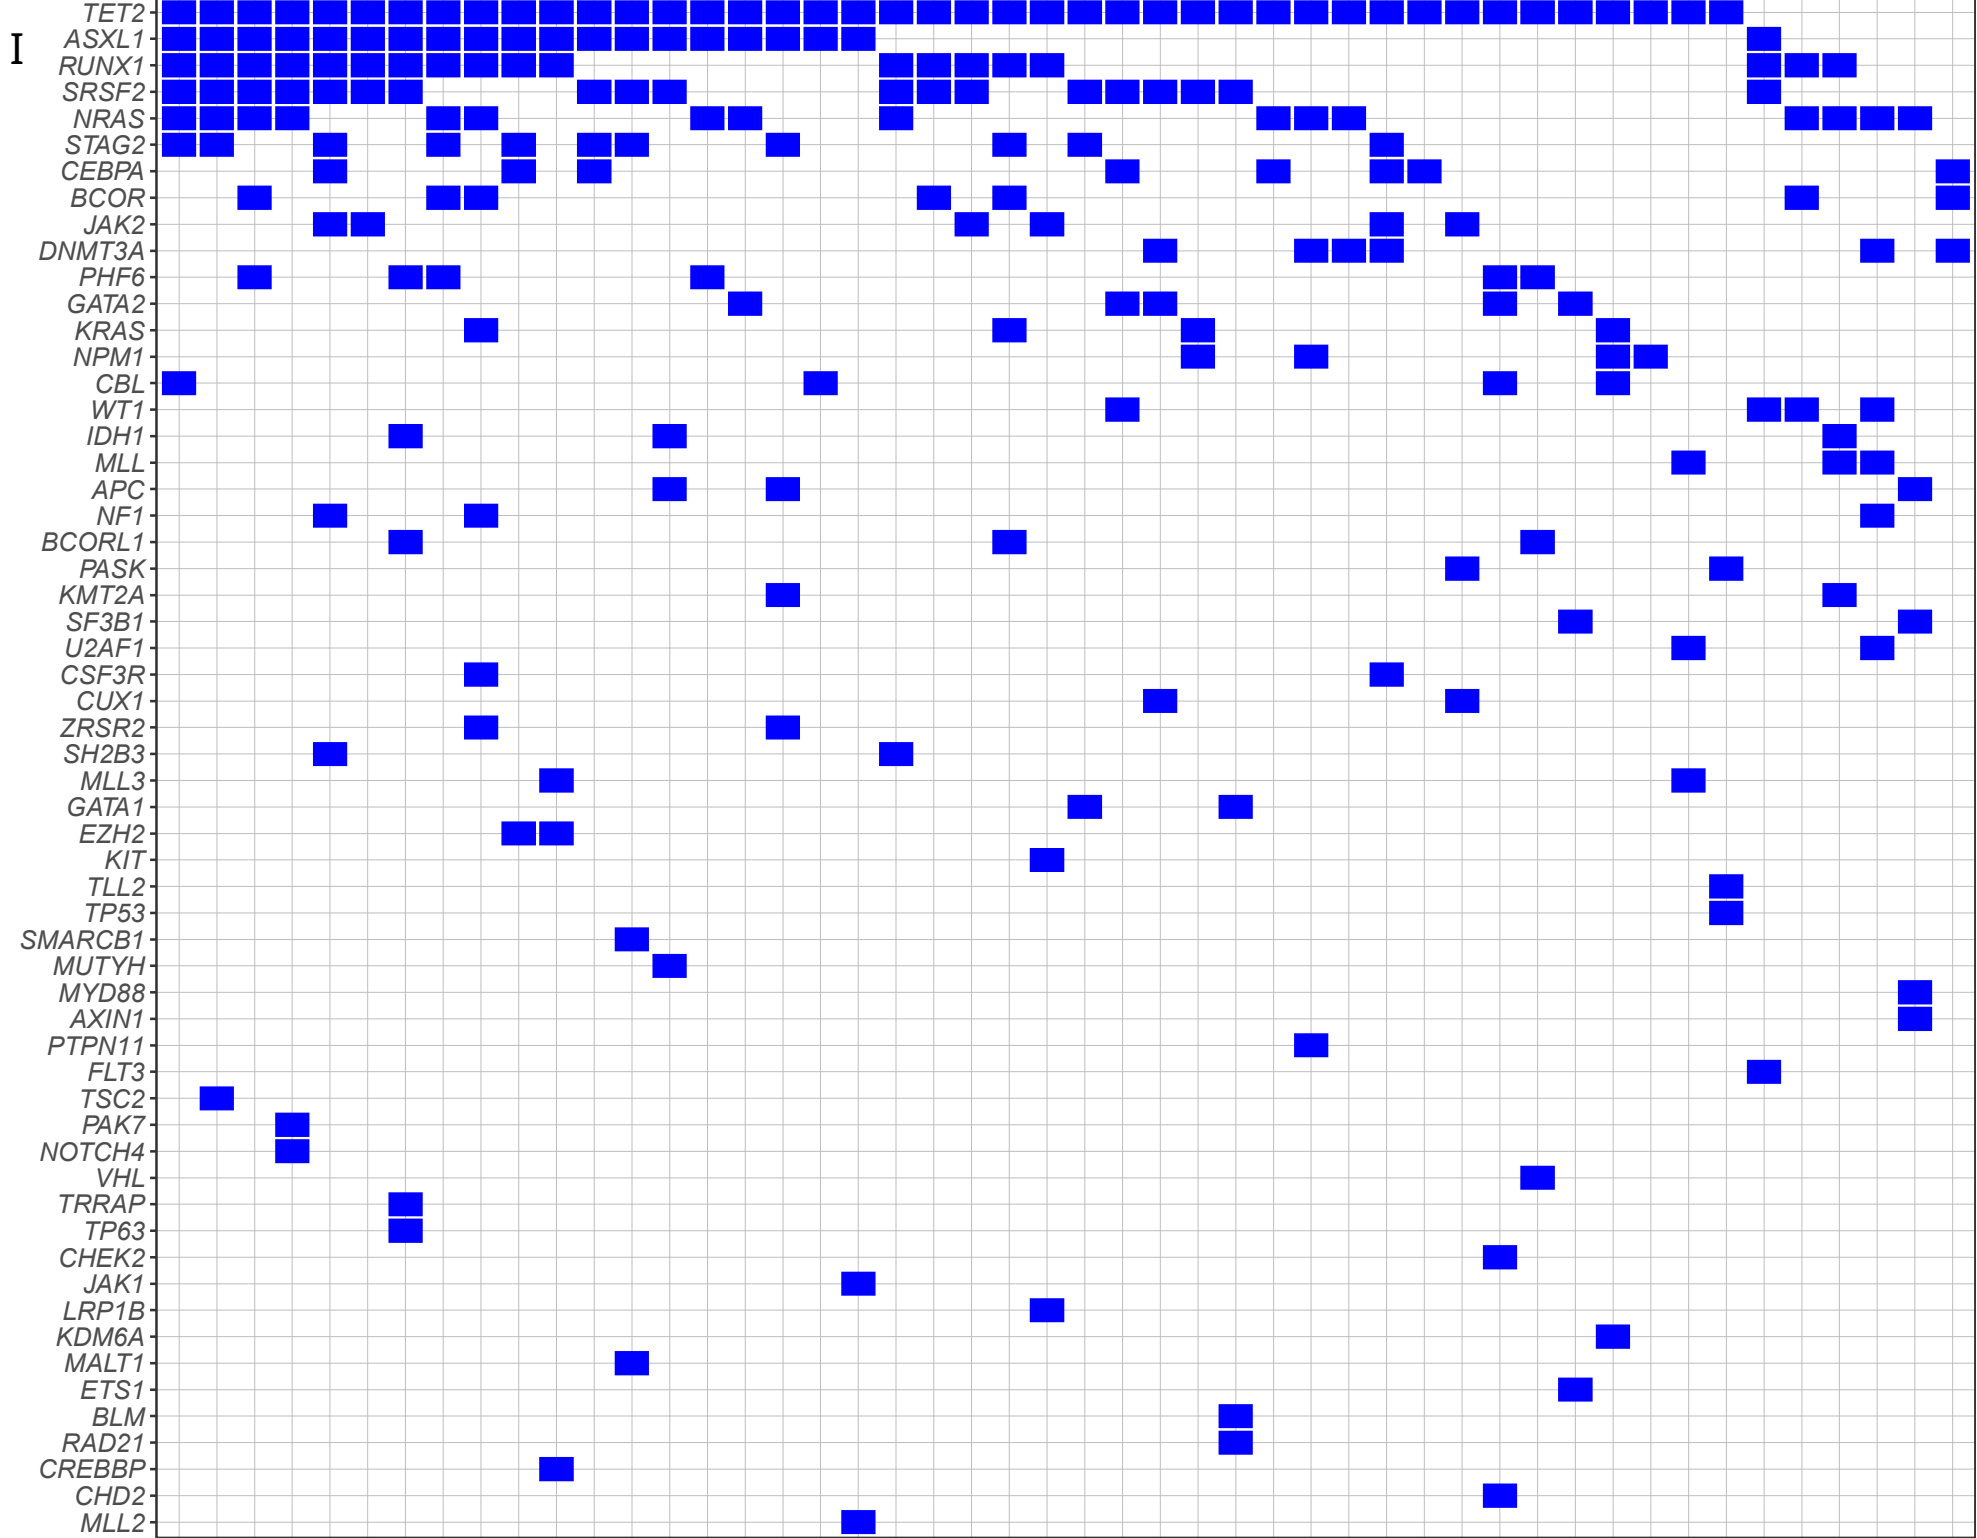

J

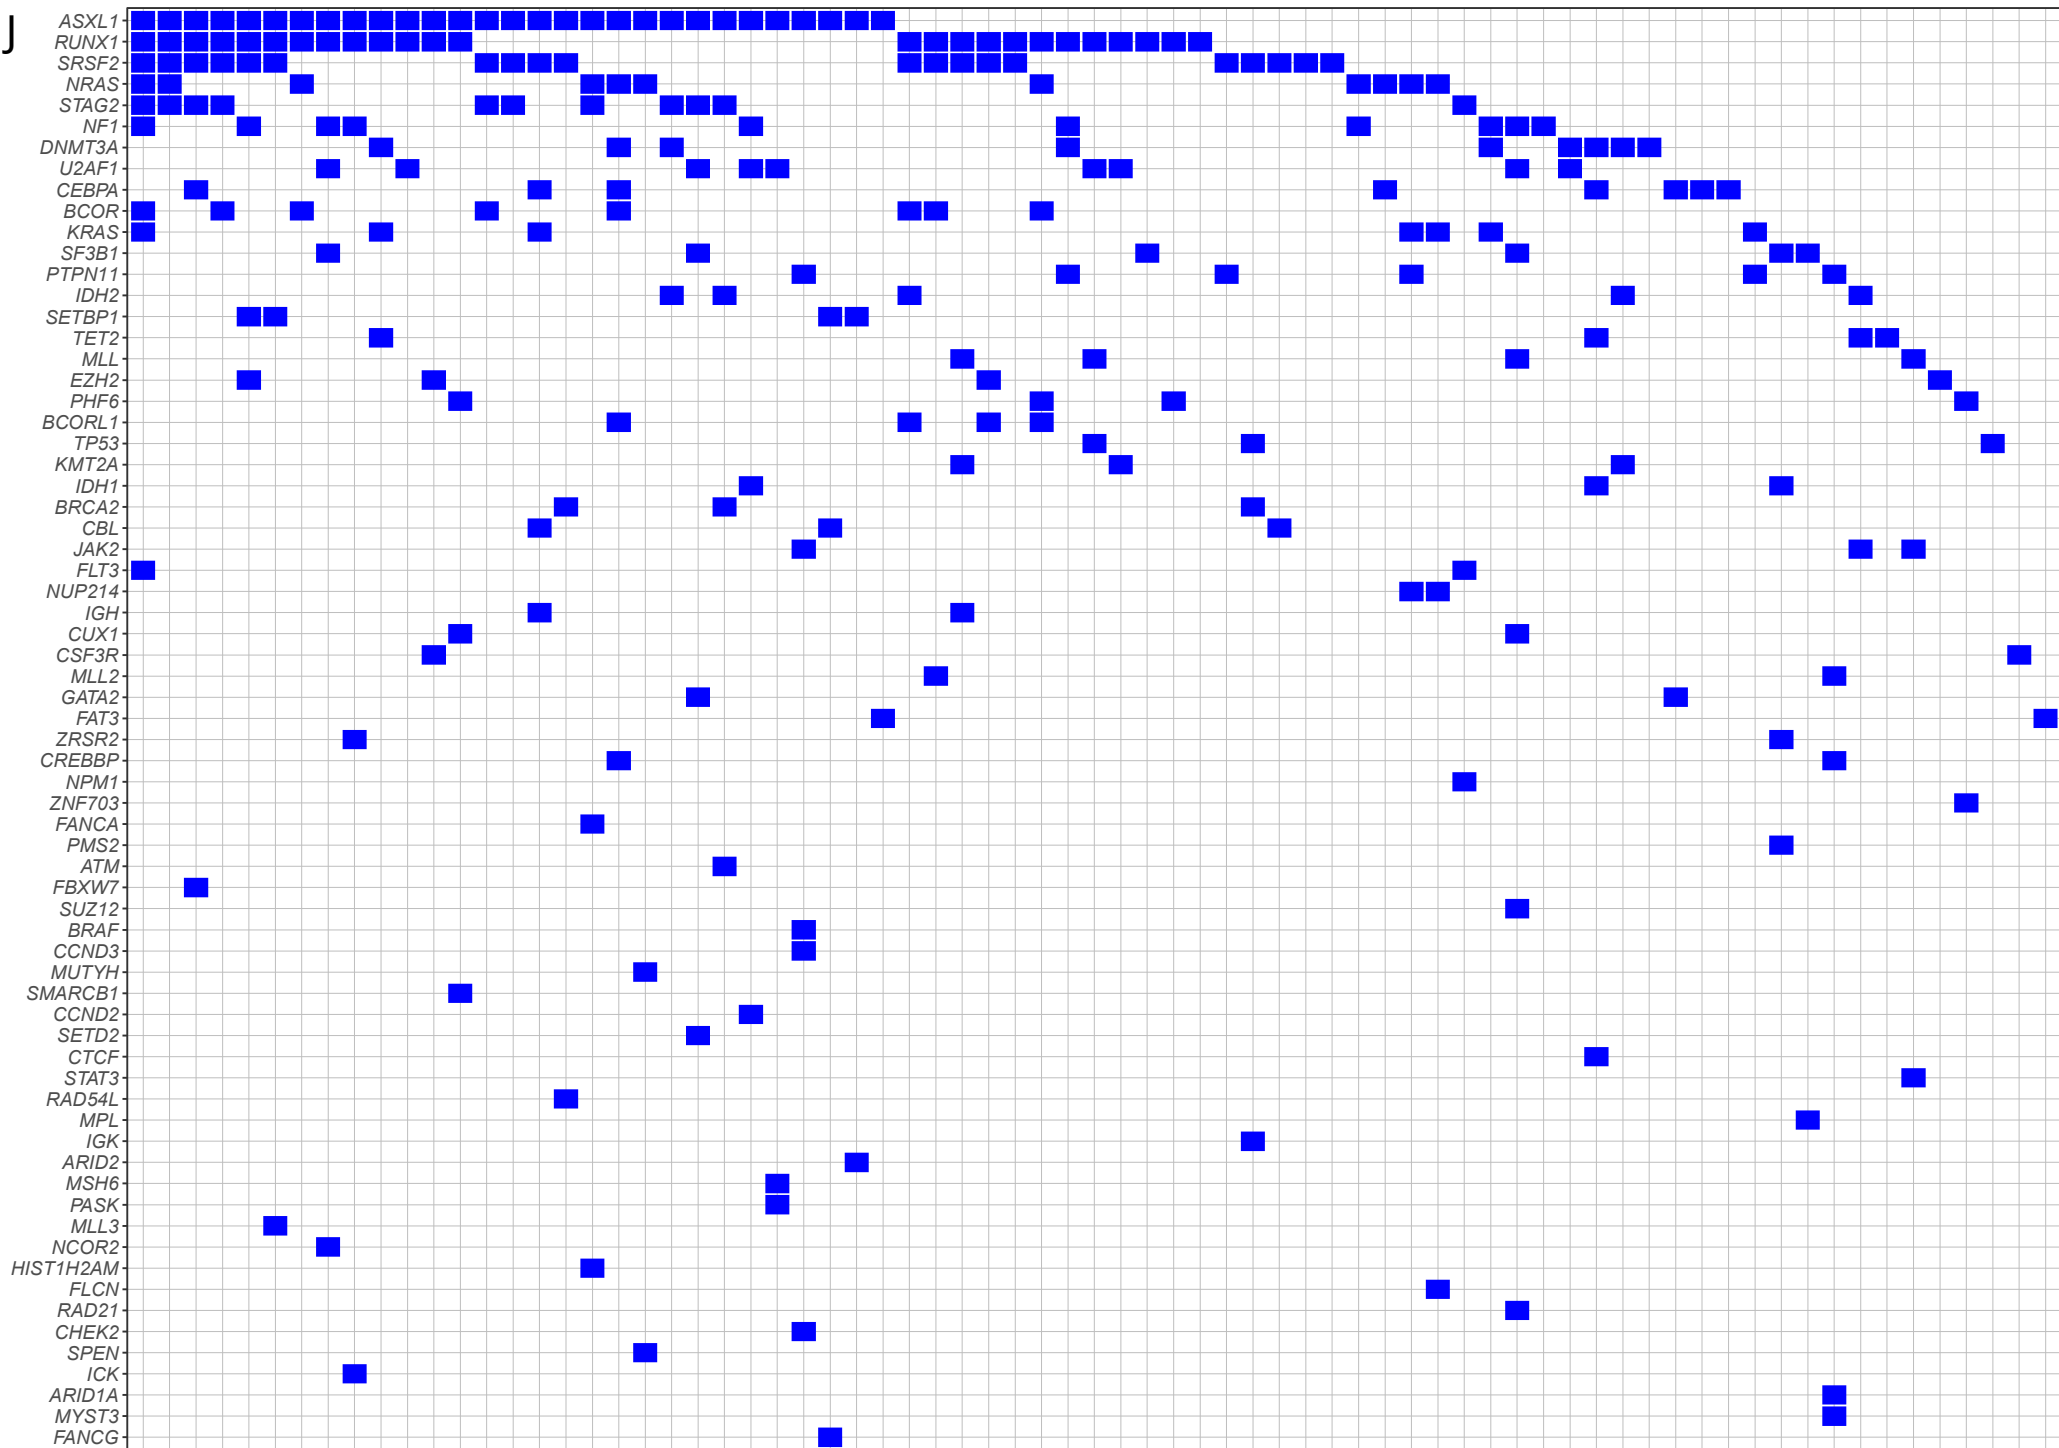

Supplement: NIHMS1743133-supplement-Supplementary_Material.pdf [file NIHMS1743133-supplement-Supplementary_Material.pdf]
